# Supplementary material for: Lymphocytic Microparticles Modulate Angiogenic Properties of Macrophages in Laser-induced Choroidal Neovascularization
Source: PubMed Central journal article supplement (PMC5118818; doi:10.1038/srep37391), 2016-11-22
Supplement: srep37391-s1.pdf [file srep37391-s1.pdf]

## Supplementary information

### Lymphocytic Microparticles Modulate Angiogenic Properties of Macrophages in Laser-induced Choroidal Neovascularization

Houda Tahiri<sup>1,3</sup>, Samy Omri<sup>2</sup>, Chun Yang<sup>3</sup>, François Duhamel<sup>1</sup>, Suzanne Samarani<sup>4</sup>, Ali Ahmad<sup>4</sup>, Mark Vezina<sup>5</sup>, Martin Bussi eres<sup>6</sup>, Elvire Vaucher<sup>7</sup>, Przemyslaw Sapiaha<sup>2,8</sup>, Gilles Hickson<sup>9</sup>, Karim Hammamji<sup>8</sup>, R ejean Lapointe<sup>10</sup>, Francis Rodier<sup>10,11</sup>, Sophie Tremblay<sup>13,14</sup>, Isabelle Royal<sup>10</sup>, Jean-Fran ois Cailhier<sup>10</sup>, Sylvain Chemtob<sup>1,2,3,8,12</sup>, and Pierre Hardy<sup>1,3,12 \*</sup>

<sup>1</sup>Department of Pharmacology, Universit e de Montr al, Montr al, QC, Canada; <sup>2</sup>Research Center H opital Maisonneuve-Rosemont, Universit e de Montr al, Montr al, QC, Canada; <sup>3</sup>Research Center CHU Sainte-Justine, Universit e de Montr al, Montr al, QC, Canada; <sup>4</sup>Departments of Microbiology and Immunology, Universit e de Montr al, Montr al, QC, Canada; <sup>5</sup>Charles River Laboratories, Senneville, Montreal, QC, Canada ; <sup>6</sup>V&O Services, Saint-Lazare, QC, Canada ; <sup>7</sup>School of Optometry, Universit e de Montr al, Montr al, QC, Canada; <sup>8</sup>Department of Ophthalmology, Universit e de Montr al, Montr al, QC, Canada; <sup>9</sup>Department of Pathology and Cell Biology, Universit e de Montr al, Montr al, QC, Canada; <sup>10</sup>Institut du Cancer de Montr al, CRCHUM – Centre de Recherche du Centre Hospitalier de l’Universit e de Montr al and Department of Medicine, Universit e de Montr al, Montr al, QC, Canada; <sup>11</sup>Department of Radiology, Radio-Oncology and Nuclear Medicine, Universit e de Montr al, Montr al, QC, Canada; <sup>12</sup>Department of Pediatrics, Universit e de Montr al, Montr al, QC, Canada; <sup>13</sup>University of British Columbia, Vancouver, BC, Canada, <sup>14</sup>Centre for Molecular Medicine and Therapeutics, Vancouver, BC, Canada

#### Corresponding author:

Pierre Hardy, M.D. Ph.D.

Research Center of CHU Sainte-Justine, 3175 C te-Sainte-Catherine, Room 2714

Montr al, Qu ebec, H3T 1C5

Phone: (514) 345-4931 (ext. 3656), Fax: (514) 345-4801

E-mail: pierre.hardy@recherche-ste-justine.qc.ca

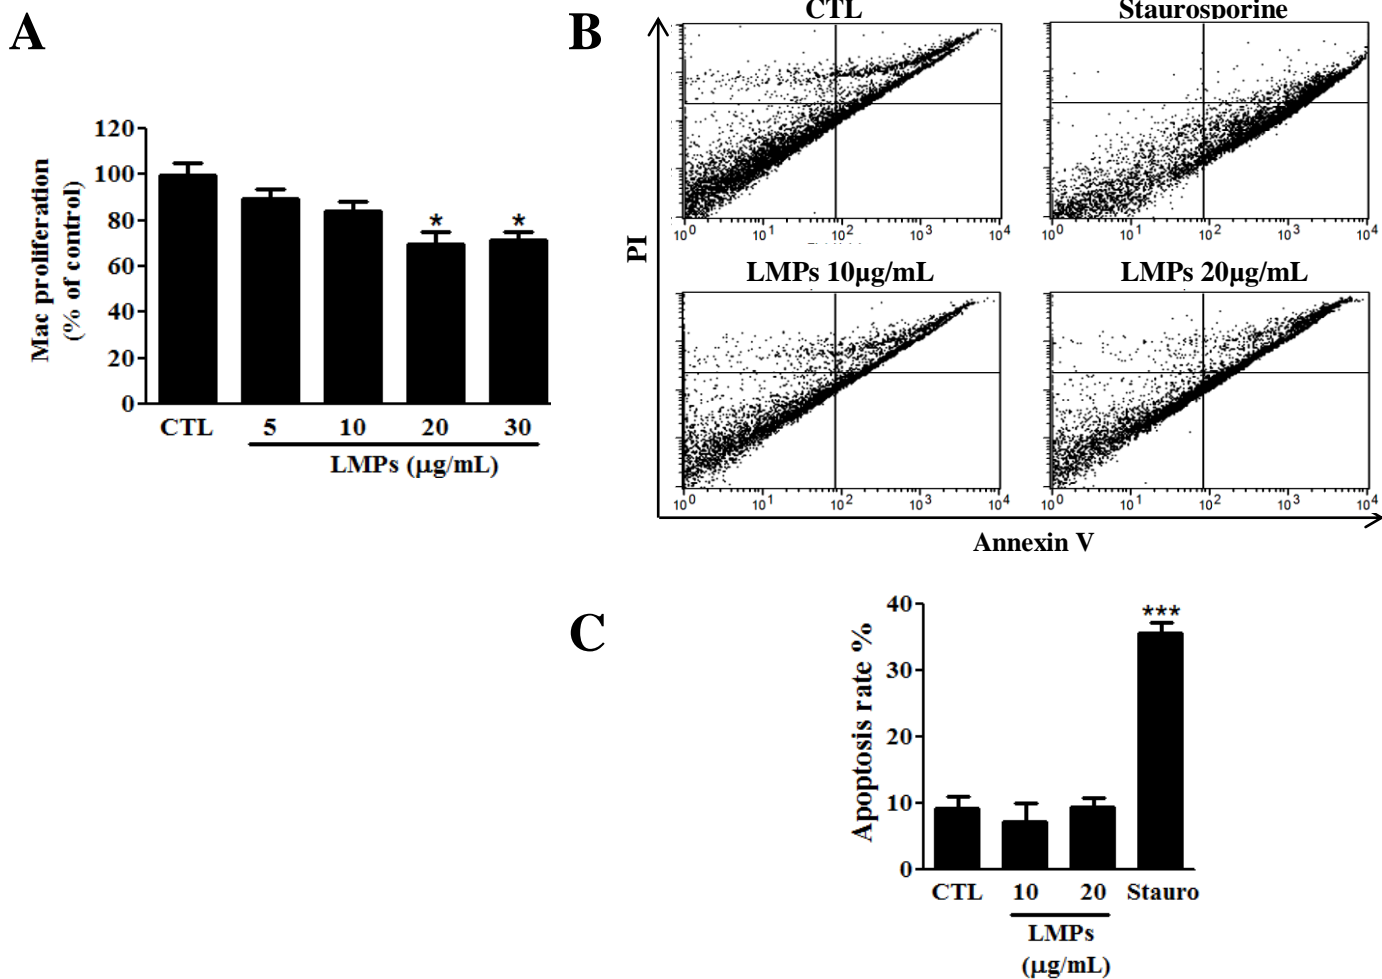

**Figure S1: LMPs dose-dependently inhibited cell proliferation of bone marrow-derived macrophages (BMDM).** With the techniques support from Dr. Jean-François Cailhier (University of Montreal), we isolated the bone marrow-derived macrophages (BMDM) from femurs of C57BL/6 mice by standard sterile techniques. BMDM were matured for 7 days in Dulbecco's modified Eagle's medium (Wisent Inc., St-Bruno, Quebec, Canada) with 10% FBS (Wisent Inc.), penicillin/streptomycin (100 mg/ml) (Wisent Inc.), and 20% L929 cell-conditioned medium as a source of macrophage-colony stimulating factor.

(A) Indicated concentrations of LMPs were incubated with BMDM for 24 hours. The proliferation of macrophages was determined using  $^3\text{H}$ -thymidine incorporation and values were presented as a percentage of control (CTL). \* $P < 0.05$  vs. CTL. (B) Representative results of flow cytometry analysis of BMDM cell apoptosis after 24-hour treatment with indicated concentrations of LMPs, or staurosporine (positive control). FACS analysis was performed after macrophages were stained with Annexin-FITC and propidium iodide using Vybrant Apoptosis assay kit. Note that the staurosporin-treated cells undergo apoptosis and become PI+/Annexin V+ in the later stages of apoptosis. (C) The apoptosis rates were presented as the percentage of apoptotic cells relative to the total cell numbers. Values are means  $\pm$  SD of 3 individual experiments. \*\*\* $P < 0.001$  vs CTL. Mac and Stauro indicate macrophages (BMDM) and staurosporin, respectively. CTL (control) means the cells treated with the last wash from the LMPs.

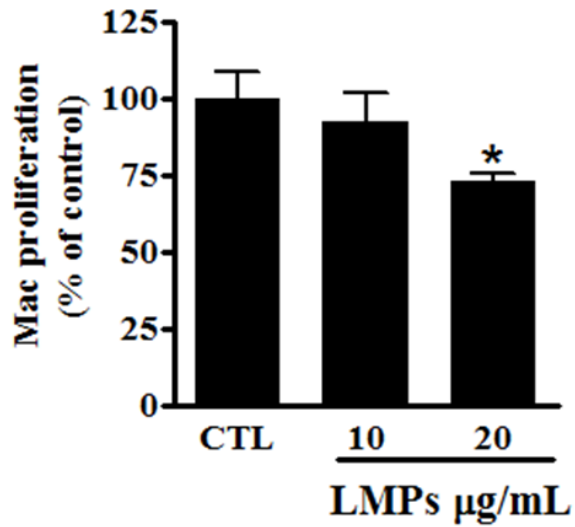

**Figure S2: LMPs dose-dependently inhibited human macrophages proliferation (HL60).** Indicated concentrations of LMPs were incubated with human macrophages cell line (HL60) for 24 h. The cell proliferation was determined using  $^3\text{H}$ -thymidine incorporation assay and values were presented as percentage of control. \* $P < 0.05$  vs. CTL

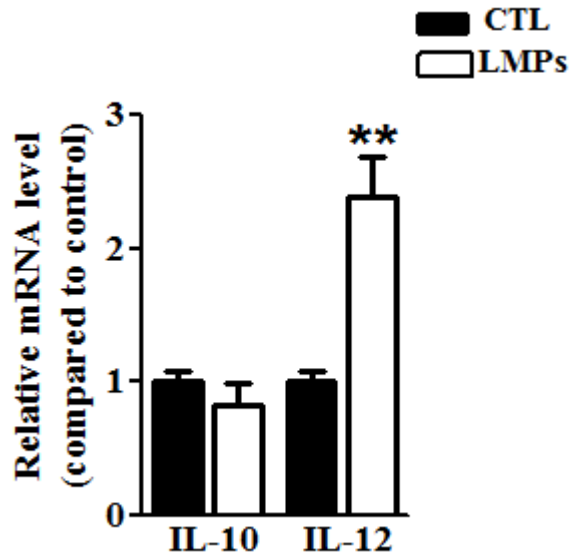

**Figure S3: LMPs altered the expression of IL-10, IL-12 in human macrophages.**

With the techniques support from Dr. Ali Ahmad (Sainte-Justine Hospital, University of Montreal), we isolated the human peripheral blood mononuclear cells (PBMCs) using centrifugation of blood over Ficoll-Hypaque (Pharmacia, Montreal, QC) and washed with the culture medium without FCS and antibiotics. Human monocytes were isolated from PBMCs by negative selection using a Human Monocyte Enrichment Kit (StemSep; Stem Cell Technology, Vancouver, BC), and then differentiated into macrophages M2 in culture medium containing 10% FCS, 5% human AB serum, and 20 ng/ml of recombinant human granulocyte-macrophage colony-stimulating factor (M-CSF; BioSource, Camarillo, CA). The mRNA expression levels of IL-10 and IL-12 were quantified by quantitative RT-PCR after macrophages were treated with 10 $\mu$ g/mL of LMPs for 24 hours. The values were presented as fold change relative to the control set as 1. \*\* $P < 0.01$  vs. CTL.

The sequences of PCR primers used in RT-PCR:

human IL-10: forward 5'-GCCTAACATGCTTCGAGATC-3',

reverse 5'-TGATGTCTGGGTCTTGGTTC-3';

human IL-12: forward 5'-GCCTACCCATTGAAGTCGTG-3',

reverse 5'-GGTTTGATGATGTCCC TCATG-3'.

**A**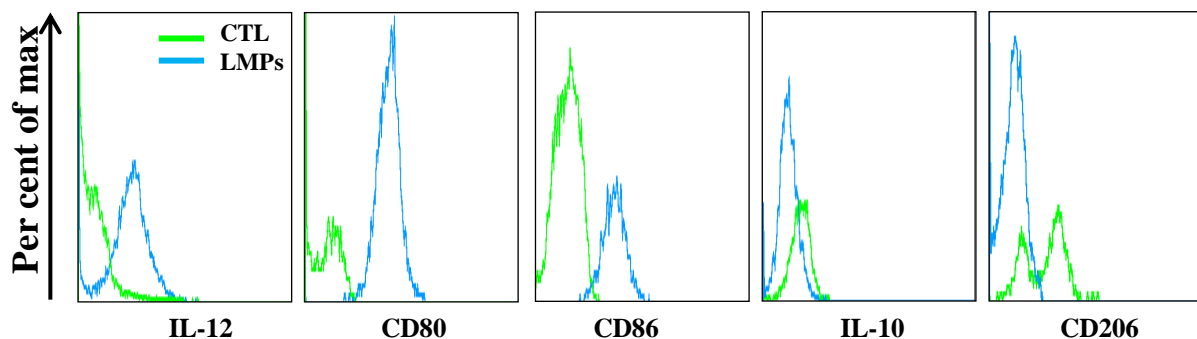**B**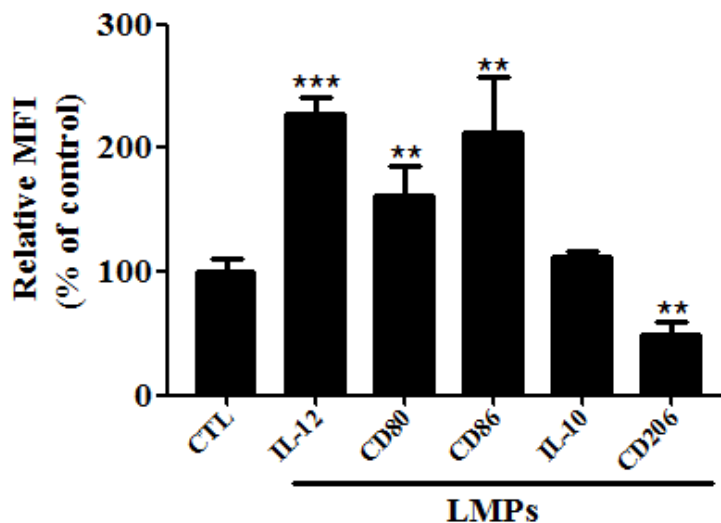

**Figure S4: LMPs altered the expression of M1 and M2 markers in human macrophages.** (A) Representative FACS analysis of the expression of IL-12, CD80, CD86, IL-10, and CD206 in human macrophages after 24-hour treatment of 10µg/mL of LMPs. (B) The number of cells expressing of IL-12, CD80, CD86, IL-10 and CD206 were calculated respectively and presented as a percentage of control (set as 100%). Values are means  $\pm$  SEM of 3 individual experiments. \*\*\*\* $P$ <0.001, \*\* $P$ <0.01 vs. CTL.

For intracellular staining of IL-10 and IL-12 cells, following specific antibodies were used: human IL-10-PE (clone, JES3-9D7), mouse IL-12-Alexa Fluor 647 (SNKY35) (eBioscience). For extracellular staining, macrophages were incubated with the followed antibodies anti-mouse CD206-PE (c19.2) (Biolegend), mouse CD86 PE (GL1), Mouse CD80 APC (2D10) (eBioscience).

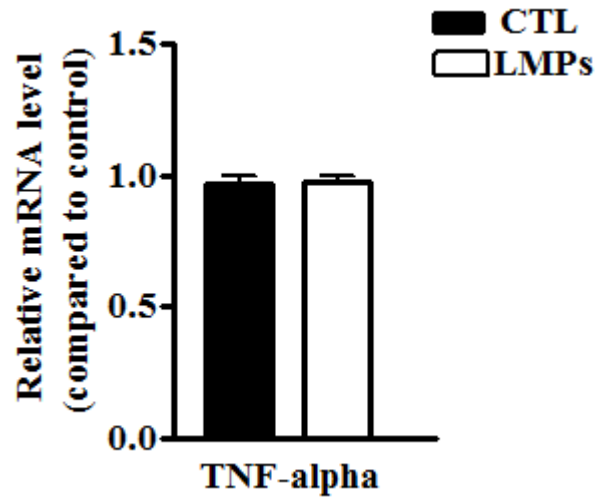

**Figure S5: The expression of TNF-alpha in macrophages was not significantly affected by LMPs treatment.** The mRNA expression level of TNF-alpha was quantified by quantitative RT-PCR after macrophages were treated with 10µg/mL of LMPs for 24 h. Values were presented as fold changes relative to control set as 1.  $P > 0.05$  vs. CTL.

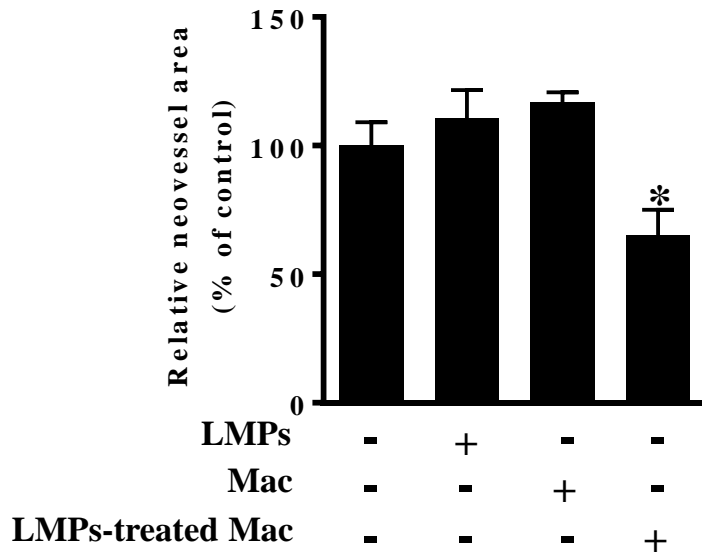

**Figure S6: LMPs stimulated the antiangiogenic activity of human macrophages.** In *ex vivo* angiogenesis assay, human RPE-free choroidal explants were cultured for 48h with normal medium (control), 50µg/mL of LMPs, co-cultured with macrophages (Mac), or LMPs-treated Mac. The neovessel areas were calculated and presented as percentage of control (set as 100%). \**P* <0.05 vs. CTL.

**A**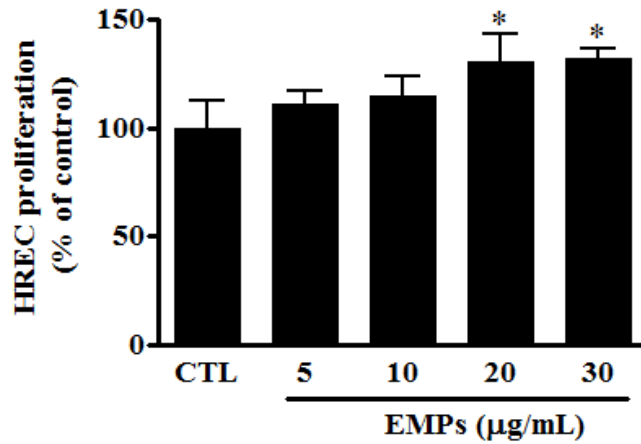**B**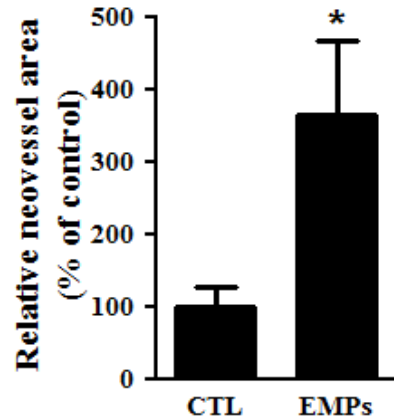

**Figure S7: Microparticles derived from human endothelial cells (EMPs) exhibited pro-angiogenic effect.** (A) Indicated concentrations of EMPs were incubated with HREC for 24 hours. The proliferation of HREC was determined using  $^3\text{H}$ -thymidine incorporation and values are presented as a percentage of CTL.  $*P < 0.05$  vs. CTL. (B) In *ex vivo* angiogenesis assay, mouse RPE-free choroidal explants were cultured for 48h with normal medium (control), 50μg/mL of EMPs. The neovessel areas were calculated and presented as percentage of control (set as 100%).  $*P < 0.05$  vs. CTL.



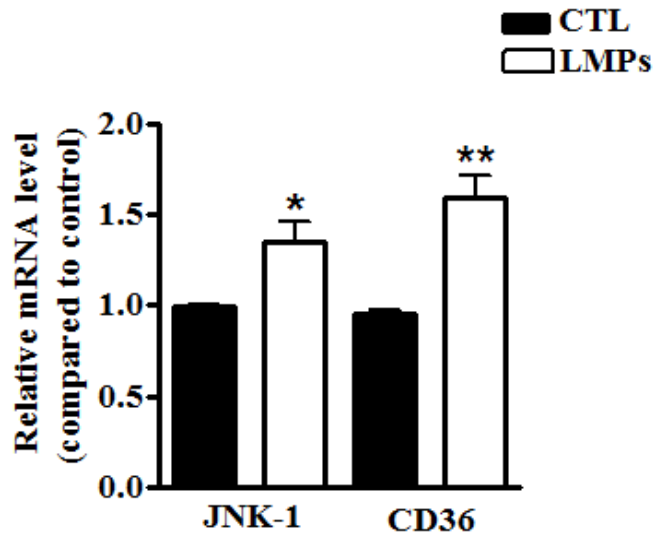

**Figure S8: LMPs increased the expression of JNK-1 and CD36 in macrophages (RAW246.7).** The mRNA levels were quantified by quantitative RT-PCR after macrophages were treated with 10 $\mu$ g/mL of LMPs for 24 h. Values were presented as fold changes relative to control group set as 1. \* $P$  <0.05, \*\* $P$  <0.01 vs. CTL.

| Gene   | Fold change | Gene    | Fold change | Gene     | Fold change | Gene     | Fold change | Gene   | Fold change | Gene  | Fold change |
|--------|-------------|---------|-------------|----------|-------------|----------|-------------|--------|-------------|-------|-------------|
| Akt1   | 1,11        | Ang     | 0,39        | Angpt1   | 1,90        | Angpt2   | 4,50        | Anpep  | 0,38        | Bai1  | 1,60        |
| Ctgf   | 1,24        | Cxcl1   | 3,01        | Cxcl2    | 4,69        | Cxcl5    | 1,94        | Edn1   | 3,34        | Efna1 | 0,91        |
| F2     | 1,22        | F3      | 0,28        | Fgf1     | 0,08        | Fgf2     | 0,55        | Fgf6   | 0,27        | Fgfr3 | 0,65        |
| Igf1   | 0,83        | I1b     | 1,14        | Il6      | 2,08        | Itgav    | 0,84        | Itgb3  | 0,07        | Jag1  | 1,69        |
| Mmp19  | 0,70        | Mmp2    | 1,03        | Mmp9     | 0,56        | Nos      | 0,36        | Nrp1   | 0,14        | Nrp2  | 0,31        |
| Prk2   | 2,20        | S1pr1   | 0,02        | Serpine1 | 0,09        | Serpinf1 | 0,27        | Smad5  | 0,18        | Sphk1 | 0,35        |
| Tgfbr1 | 0,18        | Thbs1   | 1,60        | Thbs2    | 1,07        | Tie1     | 2,04        | Timp1  | 1,08        | Tomp2 | 0,26        |
| Ccl11  | 1,09        | Ccl2    | 14,33       | Cdh5     | 0,99        | Col18a1  | 2,21        | Col4a3 | 1,42        | Csf3  | 4,89        |
| Efnb2  | 0,95        | Egf     | 0,03        | Eng      | 0,46        | Epas1    | 2,77        | Ephb4  | 0,11        | ErbB2 | 1,34        |
| Figf   | 1,52        | Flt1    | 1,06        | Fn1      | 0,87        | Hgf      | 0,97        | Hif1a  | 0,97        | Ifng  | 1,42        |
| Kdr    | 0,90        | Lect1   | 0,72        | Lep      | 0,04        | Mapk14   | 2,31        | Mdk    | 0,92        | Mmp14 | 2,12        |
| Pdgfa  | 1,02        | Pecam1  | 0,59        | Pgf      | 0,21        | Plau     | 1,41        | Pfg    | 0,36        | Pfgs1 | 0,03        |
| Tbx1   | 0,73        | Tek     | 0,03        | Tgfa     | 0,11        | Tgfb1    | 0,08        | Tgfb2  | 0,38        | Tgfb3 | 2,08        |
| Tnf    | 1,02        | Tnfsf12 | 1,60        | Tymp     | 0,75        | Vegfa    | 0,06        | Vegfb  | 0,77        | Vegfc | 0,08        |

**Table S1: LMPs modulated the expression of angiogenesis-related genes in macrophages.** RAW 246.7 cells were treated with 10µg/mL of LMPs for 24 hours, total RNAs were isolated and subjected to RT<sup>2</sup>PCR Array analysis using a mouse angiogenesis array (PAMM-024) kit from SABioscience. The values were presented as fold changes relative to control genes set as 1.
